# Supplementary material
Source: MDPI journal article supplement (https://www.mdpi.com/2075-4701/13/2/362)
Supplement: s1 [file s1]

**Supporting Materials for**

**Vacancy Formation Energy as an Effective Descriptor for the**

**Catalytic Oxidation of CO by Au Nanoparticles**

Zhiwei Zhang <sup>1</sup>, Kun Meng <sup>1</sup>, Peng Ou <sup>2,3,\*</sup>, Haijun Wu <sup>4</sup>, Yannan Zhang <sup>1</sup> and

Xiaohua Yu <sup>1,\*</sup>

1 Faculty of Materials Science and Engineering, Kunming University of Science  
and Technology, Kunming 650093, China

2 School of Mechanical Engineering, Northwestern Polytechnical University,  
Xi'an 710072, China

3 Kunming Precision Machinery Research Institute, Kunming 650118, China

4 Kunming Institute of Precious Metals Special Materials Division,  
Kunming 650106, China

\* Correspondence: 2018100130@mail.nwpu.edu.cn (P.O.);  
xiaohua\_y@163.com (X.Y.)

Table S1. The molecular dynamics simulation data and calculation results of Au nanoparticles.

| $R$                          | 1.97   | 2.21   | 2.47   | 2.75   | 3.01   | 3.25   | 3.51   | 3.77   | 4.04   | 4.31   |
|------------------------------|--------|--------|--------|--------|--------|--------|--------|--------|--------|--------|
| $r_0$                        | 0.1442 | 0.1442 | 0.1442 | 0.1442 | 0.1442 | 0.1442 | 0.1442 | 0.1442 | 0.1442 | 0.1442 |
| $N$                          | 1887   | 2664   | 3719   | 5133   | 6730   | 8515   | 10722  | 13281  | 16339  | 19834  |
| $N_0$                        | 2048   | 2916   | 4000   | 5324   | 6912   | 8788   | 10976  | 13500  | 16384  | 19652  |
| $\frac{N_0 - N}{N_0}$        | 0.079  | 0.086  | 0.070  | 0.036  | 0.026  | 0.036  | 0.028  | 0.020  | 0.007  | -0.005 |
| $\frac{N_0 r_0^3}{\eta R^3}$ | 1.085  | 1.095  | 1.076  | 1.037  | 1.027  | 1.037  | 1.028  | 1.021  | 1.007  | 0.995  |

Table S2. The simulation data of Au nanoparticles.

|                 | 1    | 2    | 3    | 4    | 5     | 6     | 7     | 8     | 9     |
|-----------------|------|------|------|------|-------|-------|-------|-------|-------|
| $R$ (nm)        | 0.97 | 2.53 | 5.05 | 7.58 | 10.20 | 15.15 | 24.95 | 40.00 | 49.91 |
| $E_v(R)/E_v(b)$ | 0.49 | 0.77 | 0.88 | 0.92 | 0.94  | 0.96  | 0.98  | 0.99  | 0.99  |

Table S3. The simulation data of Au nanoparticles.

|              | 1    | 2     | 3     | 4     | 5     | 6     | 7     | 8     | 9     | 10   |
|--------------|------|-------|-------|-------|-------|-------|-------|-------|-------|------|
| $R$ (nm)     | 6.12 | 10.97 | 16.02 | 20.88 | 26.02 | 30.97 | 36.02 | 41.17 | 45.92 | 2.18 |
| $E_v(r)/E_v$ | 0.90 | 0.94  | 0.96  | 0.97  | 0.98  | 0.98  | 0.98  | 0.99  | 0.99  | 0.72 |

Table S4. The simulation data of Au nanoparticles.

|              | 1    | 2    | 3     | 4     | 5     | 6     | 7     | 8     | 9     | 10    |
|--------------|------|------|-------|-------|-------|-------|-------|-------|-------|-------|
| $R$ (nm)     | 0.97 | 6.02 | 11.17 | 15.92 | 20.97 | 26.22 | 30.97 | 35.92 | 40.97 | 46.02 |
| $E_v(r)/E_v$ | 0.72 | 0.94 | 0.97  | 0.98  | 0.98  | 0.99  | 0.99  | 1.00  | 1.00  | 1.00  |

Table S5. The calculation parameter of the vacancy formation energy of Au nanoparticles.

| Structure | $r_{\text{Au}}$ | $CN$ | $\rho_r/\rho_0$ | $\eta$ | $U_m(\text{kJ mol}^{-1})$ | $E_v(\text{eV})$ | $T_m(\text{K})$ | $Q_m(\text{eV/atom})$ |
|-----------|-----------------|------|-----------------|--------|---------------------------|------------------|-----------------|-----------------------|
| FCC       | 0.1442          | 12   | 0.9             | 0.74   | 368                       | 1.03             | 1337            | 2.1                   |

Table S6. The size effect of the vacancy formation energy of Au nanoparticles' (111) crystal surface.

|                       | 1    | 2    | 3    | 4    | 5     | 6     | 7     | 8     | 9     | 10    |
|-----------------------|------|------|------|------|-------|-------|-------|-------|-------|-------|
| $R(\text{nm})$        | 1.10 | 1.15 | 1.20 | 1.25 | 1.30  | 1.50  | 1.50  | 1.60  | 1.60  | 1.77  |
| $E_v(R-111)/E_v(111)$ | 0.14 | 0.14 | 0.14 | 0.15 | 0.15  | 0.18  | 0.16  | 0.17  | 0.15  | 0.20  |
|                       | 11   | 12   | 13   | 14   | 15    | 16    | 17    | 18    | 19    | 20    |
| $R(\text{nm})$        | 1.80 | 1.91 | 1.90 | 2.00 | 2.00  | 2.00  | 2.10  | 2.15  | 2.40  | 3.00  |
| $E_v(R-111)/E_v(111)$ | 0.24 | 0.21 | 0.15 | 0.15 | 0.16  | 0.18  | 0.16  | 0.16  | 0.17  | 0.16  |
|                       | 21   | 22   | 23   | 24   | 25    | 26    | 27    | 28    | 29    | 30    |
| $R(\text{nm})$        | 3.50 | 4.00 | 6.50 | 7.95 | 11.00 | 13.08 | 19.09 | 22.86 | 20.06 | 17.15 |
| $E_v(R-111)/E_v(111)$ | 0.21 | 0.24 | 0.22 | 0.25 | 0.22  | 0.22  | 0.21  | 0.21  | 0.25  | 0.24  |

Table S7. The size effect of the vacancy formation energy of Ag nanoparticles' (111) crystal surface.

|                       | 1    | 2    | 3    | 4    | 5    | 6    | 7    | 8    | 9    | 10   |
|-----------------------|------|------|------|------|------|------|------|------|------|------|
| $R(\text{nm})$        | 1.25 | 1.40 | 1.75 | 1.95 | 2.19 | 2.30 | 2.37 | 2.40 | 2.47 | 2.50 |
| $E_v(R-111)/E_v(111)$ | 0.12 | 0.12 | 0.13 | 0.14 | 0.14 | 0.15 | 0.14 | 0.16 | 0.15 | 0.15 |
|                       | 11   | 12   | 13   | 14   | 15   | 16   | 17   | 18   | 19   | 20   |
| $R(\text{nm})$        | 2.70 | 2.85 | 3.05 | 3.35 | 3.20 | 3.30 | 3.50 | 3.68 | 4.18 | 4.38 |
| $E_v(R-111)/E_v(111)$ | 0.14 | 0.17 | 0.18 | 0.16 | 0.19 | 0.19 | 0.23 | 0.19 | 0.19 | 0.25 |
|                       | 21   | 22   | 23   | 24   | 25   | 26   | 27   | 28   | 29   | 30   |
| $R(\text{nm})$        | 4.45 | 4.78 | 4.38 | 5.38 | 7.80 | 9.18 | 3.41 | --   | --   | --   |
| $E_v(R-111)/E_v(111)$ | 0.22 | 0.20 | 0.20 | 0.23 | 0.25 | 0.25 | 0.27 | --   | --   | --   |

Table S8. The size effect of the vacancy formation energy of Cu nanoparticles' (111) crystal surface.

|  | 1 | 2 | 3 | 4 | 5 | 6 | 7 | 8 | 9 | 10 |
|--|---|---|---|---|---|---|---|---|---|----|
|--|---|---|---|---|---|---|---|---|---|----|

|                       |      |      |      |      |      |      |      |      |      |      |
|-----------------------|------|------|------|------|------|------|------|------|------|------|
| $R$ (nm)              | 1.20 | 1.20 | 1.50 | 1.51 | 1.50 | 2.22 | 2.50 | 2.50 | 3.38 | 3.70 |
| $E_v(R-111)/E_v(111)$ | 0.14 | 0.15 | 0.13 | 0.16 | 0.17 | 0.17 | 0.13 | 0.17 | 0.20 | 0.17 |
|                       | 11   | 12   | 13   | 14   | 15   | 16   | 17   | 18   | 19   | 20   |
| $R$ (nm)              | 3.71 | 4.00 | 5.00 | 5.5  | 5.95 | 7.01 | 7.94 | 9.08 | --   | --   |
| $E_v(R-111)/E_v(111)$ | 0.20 | 0.19 | 0.20 | 0.18 | 0.18 | 0.21 | 0.21 | 0.22 | --   | --   |

Table S9. The calculation parameter of the vacancy formation energy of Au, Ag, and Cu nanoparticles' (111) crystal surfaces.

|    |           |          |      |                 |        |      |
|----|-----------|----------|------|-----------------|--------|------|
| Au | Structure | $r_{Au}$ | $CN$ | $\rho_r/\rho_0$ | $\eta$ | $k$  |
|    | FCC       | 0.1442   | 9    | 0.9             | 0.74   | 0.25 |
| Ag | Structure | $r_{Au}$ | $CN$ | $\rho_r/\rho_0$ | $\eta$ | $k$  |
|    | FCC       | 0.144    | 9    | 0.9             | 0.74   | 0.25 |
| Cu | Structure | $r_{Au}$ | $CN$ | $\rho_r/\rho_0$ | $\eta$ | $k$  |
|    | FCC       | 0.128    | 9    | 0.9             | 0.74   | 0.25 |

Table S10. The constant pressure heat capacity ( $C_p$  (J·mol<sup>-1</sup>·K) simulation data of Au nanoparticles.

|                |            |            |            |              |            |            |            |            |            |             |
|----------------|------------|------------|------------|--------------|------------|------------|------------|------------|------------|-------------|
| LH             | 1          | 2          | 3          | 4            | 5          | 6          | 7          | 8          | 9          | 10          |
| $T$ (K)        | 100.00     | 200.0<br>0 | 300.0<br>0 | 400.00       | 500.0<br>0 | 600.0<br>0 | 700.0<br>0 | 800.0<br>0 | 900.0<br>0 | 1000.0<br>0 |
| $E_v(R,T)/E_v$ | 0.99       | 0.98       | 0.97       | 0.97         | 0.97       | 0.97       | 0.97       | 0.96       | 0.96       | 0.95        |
| ELH            | 1          | 2          | --         | QH           | 1          | 2          | --         | --         | --         | --          |
| $T$ (K)        | 200.0<br>0 | 800.0<br>0 | --         | $T$ (K)      | 200.0<br>0 | 800.0<br>0 | --         | --         | --         | --          |
| $E_v(R,T)/E_v$ | 0.98       | 0.94       | --         | $E_v(R)/E_v$ | 0.98       | 0.93       | --         | --         | --         | --          |

Table S11. The calculation parameter of the constant pressure heat capacity ( $C_p$  (J·mol<sup>-1</sup>·K) of Au nanoparticles.

|                          | 1      | 2      | 3      | 4      | 5      | 6      | 7      | 8      | 9      | 10      | 11      |
|--------------------------|--------|--------|--------|--------|--------|--------|--------|--------|--------|---------|---------|
| $T$                      | 273.15 | 298.15 | 373.15 | 473.15 | 573.15 | 673.15 | 773.15 | 873.15 | 900.00 | 900.000 | 1073.15 |
| $C_p \text{ J mol}^{-1}$ | 25.21  | 25.29  | 25.59  | 26.031 | 26.479 | 26.92  | 27.34  | 27.74  | 27.85  | 27.83   | 29.00   |
| $^1\text{K}$             |        |        |        |        |        |        |        |        |        |         |         |

Table S12. The simulation data from Li's model of Au nanoparticles.

| <b>0 K</b>       | <b>1</b>  | <b>2</b>  | <b>3</b>  | <b>4</b>  | <b>5</b>  | <b>6</b>  | <b>7</b>  | <b>8</b>  | <b>9</b>  |
|------------------|-----------|-----------|-----------|-----------|-----------|-----------|-----------|-----------|-----------|
| $R \text{ (nm)}$ | 1.00      | 2.50      | 5.00      | 7.50      | 10.00     | 15.00     | 25.00     | 40.00     | 50.00     |
| $E_v(R)/E_v$     | 0.51      | 0.80      | 0.91      | 0.95      | 0.97      | 0.99      | 1.00      | 1.01      | 1.03      |
| <b>300 K</b>     | <b>10</b> | <b>11</b> | <b>12</b> | <b>13</b> | <b>14</b> | <b>15</b> | <b>16</b> | <b>17</b> | <b>18</b> |
| $R \text{ (nm)}$ | 1.00      | 2.50      | 5.00      | 7.50      | 10.00     | 15.00     | 25.00     | 40.00     | 50.00     |
| $E_v(R)/E_v$     | 0.50      | 0.78      | 0.89      | 0.93      | 0.95      | 0.97      | 0.99      | 1.00      | 1.02      |
| <b>800 K</b>     | <b>10</b> | <b>20</b> | <b>21</b> | <b>22</b> | <b>23</b> | <b>24</b> | <b>25</b> | <b>26</b> | <b>27</b> |
| $R \text{ (nm)}$ | 1.00      | 2.50      | 5.00      | 7.50      | 10.00     | 15.00     | 25.00     | 40.00     | 50.00     |
| $E_v(R)/E_v$     | 0.48      | 0.75      | 0.86      | 0.90      | 0.92      | 0.94      | 0.95      | 0.96      | 0.97      |
| <b>Melting K</b> | <b>28</b> | <b>29</b> | <b>30</b> | <b>31</b> | <b>32</b> | <b>33</b> | <b>34</b> | <b>35</b> | <b>36</b> |
| $R \text{ (nm)}$ | 1.00      | 2.50      | 5.00      | 7.50      | 10.00     | 15.00     | 25.00     | 40.00     | 50.00     |
| $E_v(R)/E_v$     | 0.46      | 0.72      | 0.82      | 0.86      | 0.88      | 0.89      | 0.91      | 0.92      | 0.92      |

Table S13. The simulation data from Ouyang's model of Au nanoparticles in 0 K.

| <b>0 K</b>       | <b>1</b>  | <b>2</b>  | <b>3</b>  | <b>4</b>  | <b>5</b>  | <b>6</b>  | <b>7</b>  | <b>8</b>  | <b>9</b>  |
|------------------|-----------|-----------|-----------|-----------|-----------|-----------|-----------|-----------|-----------|
| $R \text{ (nm)}$ | 0.69      | 1.00      | 1.31      | 1.92      | 3.62      | 5.92      | 8.23      | 10.54     | 12.85     |
| $E_v(R)/E_v$     | 0.08      | 0.39      | 0.53      | 0.69      | 0.84      | 0.91      | 0.94      | 0.95      | 0.96      |
| <b>10</b>        | <b>11</b> | <b>12</b> | <b>13</b> | <b>14</b> | <b>15</b> | <b>16</b> | <b>17</b> | <b>18</b> | <b>19</b> |
| 7.58             | 15.15     | 17.46     | 19.77     | 22.08     | 24.38     | 26.69     | 29.00     | 31.31     | 33.69     |
| 0.97             | 0.97      | 0.97      | 0.98      | 0.98      | 0.98      | 0.99      | 0.99      | 0.99      | 0.99      |
| <b>20</b>        | <b>21</b> | <b>22</b> | <b>23</b> | <b>24</b> | <b>25</b> | <b>26</b> | <b>27</b> | <b>28</b> | <b>29</b> |
| 19.12            | 36.00     | 38.23     | 40.54     | 42.92     | 45.15     | 47.46     | 49.77     | --        | --        |

|      |      |      |      |      |      |      |      |    |    |
|------|------|------|------|------|------|------|------|----|----|
| 0.99 | 0.99 | 0.99 | 0.99 | 0.99 | 0.99 | 0.99 | 0.99 | -- | -- |
|------|------|------|------|------|------|------|------|----|----|

Table S14. The simulation data from Ouyang's model of Au nanoparticles in 300 K.

| <b>300 K</b>       | <b>1</b>  | <b>2</b>  | <b>3</b>  | <b>4</b>  | <b>5</b>  | <b>6</b>  | <b>7</b>  | <b>8</b>  | <b>9</b>  |
|--------------------|-----------|-----------|-----------|-----------|-----------|-----------|-----------|-----------|-----------|
| $R$ (nm)           | 1.28      | 1.51      | 3.56      | 5.86      | 8.16      | 10.47     | 12.77     | 15.07     | 17.38     |
| $E_{v\otimes}/E_v$ | 0.33      | 0.40      | 0.62      | 0.68      | 0.70      | 0.72      | 0.73      | 0.73      | 0.74      |
| <b>10</b>          | <b>11</b> | <b>12</b> | <b>13</b> | <b>14</b> | <b>15</b> | <b>16</b> | <b>17</b> | <b>18</b> | <b>19</b> |
| 19.68              | 22.00     | 24.29     | 26.59     | 28.90     | 31.20     | 33.51     | 35.81     | 38.11     | 40.42     |
| 0.74               | 0.74      | 0.74      | 0.74      | 0.74      | 0.75      | 0.75      | 0.75      | 0.75      | 0.75      |
| <b>20</b>          | <b>21</b> | <b>22</b> | <b>23</b> | <b>24</b> | <b>25</b> | <b>26</b> | <b>27</b> | <b>28</b> | <b>29</b> |
| 42.72              | 45.03     | 47.33     | 49.63     | --        | --        | --        | --        | --        | --        |
| 0.75               | 0.75      | 0.75      | 0.75      | --        | --        | --        | --        | --        | --        |

Table S15. The Linear relationship between the chemical bond energy and vacancy formation of face-centered cubic crystals.

| <b>Elements</b>              | <b>W</b>  | <b>Ta</b> | <b>Mo</b> | <b>Zr</b> | <b>Pt</b> | <b>V</b>  | <b>Ti</b> | <b>Co</b> | <b>Cr</b> |
|------------------------------|-----------|-----------|-----------|-----------|-----------|-----------|-----------|-----------|-----------|
| $E_m$ (kJmol <sup>-1</sup> ) | 838.62    | 784.71    | 660.42    | 612.60    | 564.71    | 510.88    | 489.89    | 427.07    | 395.64    |
| $E_v$ (eV)                   | 2.21      | 2.01      | 1.55      | 1.53      | 1.40      | 1.32      | 1.21      | 1.10      | 1.00      |
| <b>Elements</b>              | <b>Fe</b> | <b>Au</b> | <b>Be</b> | <b>Al</b> | <b>Ag</b> | <b>Pb</b> | <b>Mg</b> | <b>Li</b> | <b>Zn</b> |
| $E_m$ (kJmol <sup>-1</sup> ) | 416.57    | 367.24    | 320.85    | 322.32    | 286.39    | 198.12    | 160.69    | 147.25    | 129.27    |
| $E_v$ (eV)                   | 1.03      | 0.98      | 0.86      | 0.83      | 0.70      | 0.51      | 0.37      | 0.38      | 0.30      |

Table S16. Linear relationship between vacancy-forming energy and diffusion activation energy in common metal materials.

|            | <b>Al</b> | <b>Cd</b> | <b>Co</b> | <b>Cu</b> | <b>Au</b> | <b>Fe</b> | <b>Pb</b> | <b>Li</b> | <b>Pt</b> | <b>Ag</b> | <b>Na</b> | <b>W</b> | <b>Zn</b> |
|------------|-----------|-----------|-----------|-----------|-----------|-----------|-----------|-----------|-----------|-----------|-----------|----------|-----------|
| $E_v$ (eV) | 0.84      | 0.29      | 1.1       | 0.88      | 0.98      | 1.03      | 0.51      | 0.38      | 1.4       | 0.23      | 0.71      | 0.28     | 0.34      |
| Q(eV)      | 1.43      | 0.81      | 2.9       | 2.04      | 1.7       | 3.17      | 1.05      | 0.41      | 2.5       | 0.39      | 1.91      | 0.45     | 1         |
